# Supplementary material for: Parallel Evolution of KCNQ4 in Echolocating Bats
Source: PubMed Central journal article supplement (PMC3200345; doi:10.1371/journal.pone.0026618), 2011-10-24
Supplement: pone.0026618.s001.pdf [file pone.0026618.s001.pdf]

Figure S1

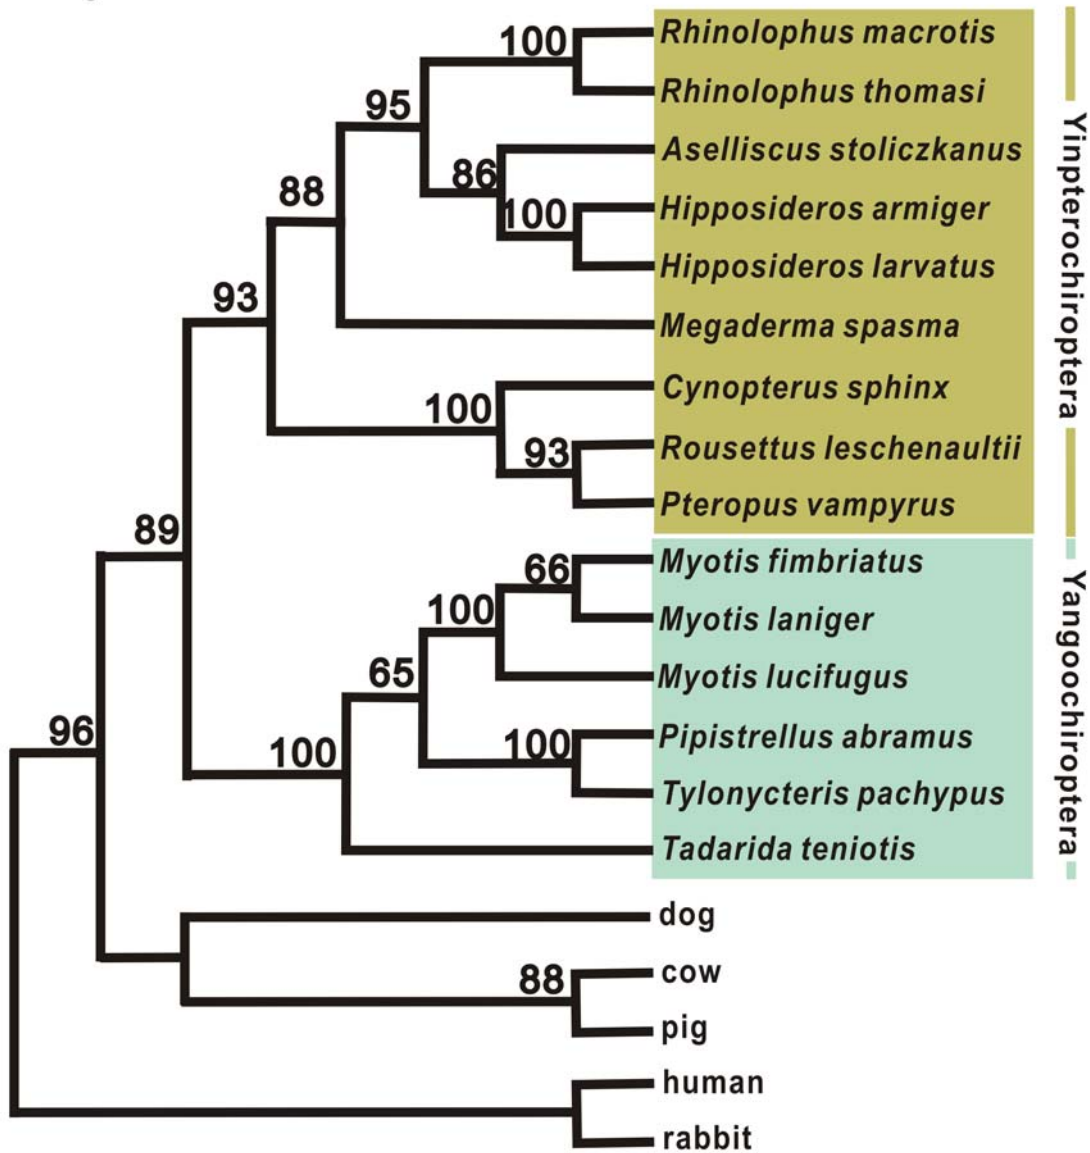

Figure S1. Phylogenetic tree of KCNQ4 inferred from synonymous sites by using Neighbor-Joining method based on Jukes-Cantor model. Numbers on the branches indicate the bootstrap values (not shown below 50)
